# Supplementary material for: Deciphering the Systemic Impact of Herbal Medicines on Allergic Rhinitis: A Network Pharmacological Approach
Source: MDPI journal article supplement (doi:10.3390/life14050553), 2024-04-25
Supplement: s1 [file s1]

Supplementary Table S1. Representative prescriptions for allergic rhinitis analyzed in this study.

| Prescription                         | Kun                                                        | Shin                                      | Choa                              | Sa                 |
|--------------------------------------|------------------------------------------------------------|-------------------------------------------|-----------------------------------|--------------------|
| Socheongryong-tang <sup>13</sup>     | Ephedra<br>intermedia                                      | Zingiber<br>officinale Roscoe             | Schisandra<br>chinensis Baillon   | Glycyrrhiza glabra |
|                                      | Cinnamomum<br>cassia                                       | Asiasarum sieboldii                       | Paeonia<br>lactiflora Pallas      |                    |
|                                      |                                                            |                                           | Pinellia ternata                  |                    |
| Okbyungpoong-san <sup>14</sup>       | Astragalus<br>membranaceus                                 | Atractylodes<br>macrocephala Koidzumi     | Saposhnikovia<br>divaricata       |                    |
| Bojungikgi-tang <sup>13</sup>        | Astragalus<br>membranaceus                                 | Panax ginseng                             | Angelica gigas Nakai              | Glycyrrhiza glabra |
|                                      |                                                            | Glycyrrhiza glabra                        | Citrus<br>unshiu Markovich        |                    |
|                                      |                                                            | Atractylodes<br>macrocephala Koidzumi     | Cimicifuga<br>dahurica Maximowicz |                    |
|                                      |                                                            |                                           | Bupleurum falcatum                |                    |
| Mahwangbujaseshin-tang <sup>14</sup> | Ephedra<br>intermedia                                      | Asiasarum sieboldii                       |                                   |                    |
|                                      | Aconitum<br>carmichaelii                                   |                                           |                                   |                    |
| Hyongeyonggyo-tang                   | Schizonepeta tenuifolia Briquet                            |                                           |                                   |                    |
|                                      | Bupleurum falcatum Linné                                   |                                           |                                   |                    |
|                                      | Ligusticum chuanxiong                                      |                                           |                                   |                    |
|                                      | Angelica gigas Nakai                                       |                                           |                                   |                    |
|                                      | Rehmannia glutinosa Liboschitz ex Steudel                  |                                           |                                   |                    |
|                                      | Paeonia lactiflora Pallas                                  |                                           |                                   |                    |
|                                      | Angelica dahurica                                          |                                           |                                   |                    |
|                                      | Saposhnikovia divaricate                                   |                                           |                                   |                    |
|                                      | Mentha arvensis Linné var. piperascens Malinvaud ex Holmes |                                           |                                   |                    |
|                                      | Gardenia jasminoides Ellis                                 |                                           |                                   |                    |
|                                      | Scutellaria baicalensis Georgi                             |                                           |                                   |                    |
|                                      | Platycodon grandiflorum A. De Candolle                     |                                           |                                   |                    |
|                                      | Forsythia suspensa Vahl                                    |                                           |                                   |                    |
|                                      | Glycyrrhiza glabra                                         |                                           |                                   |                    |
| Samsocum <sup>13</sup>               | Perilla<br>frutescens<br>Britton                           | Angelica decursiva                        | Panax ginseng                     | Glycyrrhiza glabra |
|                                      | Pueraria lobata                                            | Pinellia ternata                          | Poria cocos                       |                    |
|                                      |                                                            | Platycodon<br>grandiflorum A. De Candolle | Aucklandia<br>Decne.              | lappa              |
|                                      |                                                            | Citrus<br>unshiu Markovich                |                                   |                    |
|                                      |                                                            | Citrus aurantium                          |                                   |                    |
| Galgeun-tang <sup>15</sup>           | Pueraria lobata                                            | Ephedra intermedia                        | Cinnamomum cassia                 | Glycyrrhiza glabra |

|                                               |                                                                                                                                                                                                                                                                                                                                                                                                                                                            |                                                                                                                                                                                                                                                                                                                                 |                                                                                   |                                        |
|-----------------------------------------------|------------------------------------------------------------------------------------------------------------------------------------------------------------------------------------------------------------------------------------------------------------------------------------------------------------------------------------------------------------------------------------------------------------------------------------------------------------|---------------------------------------------------------------------------------------------------------------------------------------------------------------------------------------------------------------------------------------------------------------------------------------------------------------------------------|-----------------------------------------------------------------------------------|----------------------------------------|
|                                               |                                                                                                                                                                                                                                                                                                                                                                                                                                                            |                                                                                                                                                                                                                                                                                                                                 | Paeonia<br>lactiflora Pallas                                                      | Zingiber<br>officinale Roscoe          |
|                                               |                                                                                                                                                                                                                                                                                                                                                                                                                                                            |                                                                                                                                                                                                                                                                                                                                 |                                                                                   | Zizyphus jujuba<br>Miller              |
| Yeotaectonggi-tang <sup>16</sup>              | Astragalus<br>membranaceus                                                                                                                                                                                                                                                                                                                                                                                                                                 | Atractylodes lancea DC.<br>Ostericum koreanum<br>Aralia continentalis<br>Saposhnikovia divaricata<br>Cimicifuga dahurica Maximowicz<br>Pueraria lobata<br>Glycyrrhiza glabra<br>Ephedra intermedia<br>Rubia akane Nakai<br>Angelica dahurica<br>Zingiber officinale Roscoe<br>Zizyphus jujuba Miller<br>Allium fistulosum Linné |                                                                                   |                                        |
| Younggamgangmisinhayin-<br>tang <sup>17</sup> | Poria cocos                                                                                                                                                                                                                                                                                                                                                                                                                                                | Zingiber<br>officinale Roscoe<br>Asiasarum sieboldii                                                                                                                                                                                                                                                                            | Schisandra<br>chinensis Baillon<br>Prunus armeniaca L.<br>var. ansu Maxim.        | Glycyrrhiza glabra<br>Pinellia ternata |
| Insampaedok-san                               | Angelica decursiva<br>Aralia continentalis<br>Bupleurum falcatum<br>Citrus aurantium L.<br>Cnidium officinale Makino<br>Forsythia viridissima Lindl.<br>Glycyrrhiza uralensis Fisch.<br>Lonicera japonica Thunb.<br>Mentha arvensis L.<br>Ostericum koreanum Kitag.<br>Panax ginseng C. A. Mey.<br>Platycodon grandiflorus A. DC.<br>Poria cocos Wolf<br>Saposhnikovia divaricata Schischk.<br>Schizonepeta tenuifolia Briq.<br>Zingiber officinale Roscoe |                                                                                                                                                                                                                                                                                                                                 |                                                                                   |                                        |
| Yukmijihwang-tang <sup>13</sup>               | Rehmannia<br>glutinosa<br>Liboschitz ex<br>Steudel                                                                                                                                                                                                                                                                                                                                                                                                         | Cornus officinalis<br>Siebold et Zuccarini<br>Dioscorea batatas<br>Decaisne                                                                                                                                                                                                                                                     | Alisma orientale<br>(Sam.) Juz.<br>Paeonia suffruticosa<br>Andrews<br>Poria cocos |                                        |
| Maekmundong-tang <sup>13</sup>                | Ophiopogon<br>japonicus Ker-<br>Gawler                                                                                                                                                                                                                                                                                                                                                                                                                     | Panax ginseng<br>Glycyrrhiza glabra<br>Oryza sativa Linné<br>Zizyphus jujuba Miller                                                                                                                                                                                                                                             | Pinellia ternata                                                                  | Glycyrrhiza glabra                     |

---

Supplementary Table S2. Calculation process of disease specificity

| Herb                                      | Frequency in<br>TCMID | TF       | Ln(IDF)  | TF x LN(IDF) x<br>100 |
|-------------------------------------------|-----------------------|----------|----------|-----------------------|
| <i>Ephedra intermedia</i>                 | 1753                  | 0.057143 | 3.287307 | 18.78461266           |
| <i>Pueraria lobata</i>                    | 1240                  | 0.042857 | 3.633524 | 15.57224761           |
| <i>Poria cocos</i>                        | 3739                  | 0.057143 | 2.529818 | 14.45610072           |
| <i>Pinellia ternata</i>                   | 4086                  | 0.057143 | 2.441069 | 13.94896757           |
| <i>Glycyrrhiza glabra</i>                 | 11659                 | 0.1      | 1.392557 | 13.92557407           |
| <i>Asiasarum sieboldii</i>                | 2044                  | 0.042857 | 3.133727 | 13.43025921           |
| <i>Cinnamomum cassia</i> Presl            | 633                   | 0.028571 | 4.305921 | 12.30263051           |
| <i>Bupleurum falcatum</i>                 | 2712                  | 0.042857 | 2.850949 | 12.21835479           |
| <i>Platycodon grandiflorum</i>            | 2775                  | 0.042857 | 2.827985 | 12.11993603           |
| <i>Astragalus membranaceus</i>            | 2980                  | 0.042857 | 2.756713 | 11.81448223           |
| <i>Angelica decursiva</i>                 | 1015                  | 0.028571 | 3.833747 | 10.95356345           |
| <i>Aralia continentalis</i>               | 1137                  | 0.028571 | 3.720243 | 10.62926459           |
| <i>Panax ginseng</i>                      | 7553                  | 0.057143 | 1.826691 | 10.43823421           |
| <i>Saposhnikovia divaricata</i>           | 4181                  | 0.042857 | 2.418085 | 10.36322301           |
| <i>Schisandra chinensis</i> Baillon       | 1821                  | 0.028571 | 3.24925  | 9.283571487           |
| <i>Atractylodes macrocephala</i> Koidzumi | 5469                  | 0.042857 | 2.14954  | 9.212314444           |
| <i>Cimicifuga dahurica</i> Maximowicz     | 2066                  | 0.028571 | 3.123021 | 8.92291843            |
| <i>Ostericum koreanum</i>                 | 2204                  | 0.028571 | 3.058362 | 8.738176943           |
| <i>Angelica dahurica</i>                  | 2325                  | 0.028571 | 3.004916 | 8.585473663           |
| <i>Zingiber officinale</i> Roscoe         | 2847                  | 0.028571 | 2.80237  | 8.006771466           |
| <i>Citrus aurantium</i>                   | 2858                  | 0.028571 | 2.798514 | 7.995753548           |
| <i>Paeonia lactiflora</i> Pallas          | 3228                  | 0.028571 | 2.676773 | 7.64792306            |
| <i>Citrus unshiu</i> Markovich            | 3829                  | 0.028571 | 2.506032 | 7.160091854           |
| <i>Ligusticum chuanxiong</i>              | 4140                  | 0.028571 | 2.42794  | 6.936971524           |
| <i>Angelica gigas</i> Nakai               | 8262                  | 0.028571 | 1.736969 | 4.962768949           |

Supplementary Table S3. Compound-target interactions of overlapped genes between targets of AR-specific herbs and AR-related genes

| Herb                       | Compound                | Gene   | Herb                            | Compound           | Gene   |
|----------------------------|-------------------------|--------|---------------------------------|--------------------|--------|
| <i>Ephedra intermedia</i>  | apigenin                | CAT    | <i>Asiasarum sieboldii</i>      | pentadecanoic acid | TBXA2R |
|                            | styrene                 | CAT    |                                 | hexadecanoic acid  | TBXA2R |
|                            | ethanol                 | CAT    |                                 | camphor            | NPY    |
|                            | apigenin                | PTGS2  | <i>Cinnamomum cassia</i>        | styrene            | CAT    |
|                            | styrene                 | PTGS2  |                                 | styrene            | PTGS2  |
|                            | dodecanoic acid         | PTGS2  |                                 | cinnamaldehyde     | PTGS2  |
|                            | lauric acid             | PTGS2  | <i>Bupleurum falcatum</i>       | camphor            | NPY    |
|                            | hexadecanoic acid       | PTGS2  |                                 | coumarin           | NPY    |
|                            | ethanol                 | PTGS2  |                                 | quercetin          | CAT    |
|                            | hexanoic acid           | HRH1   |                                 | lauric acid        | PTGS2  |
|                            | pentadecanoic acid      | HRH1   |                                 | palmitic acid      | PTGS2  |
|                            | dodecanoic acid         | HRH1   |                                 | quercetin          | PTGS2  |
|                            | lauric acid             | HRH1   |                                 | lauric acid        | HRH1   |
|                            | hexadecanoic acid       | HRH1   |                                 | palmitic acid      | HRH1   |
|                            | hexanoic acid           | TBXA2R |                                 | lauric acid        | TBXA2R |
|                            | pentadecanoic acid      | TBXA2R |                                 | palmitic acid      | TBXA2R |
|                            | dodecanoic acid         | TBXA2R | <i>Astragalus membranaceus</i>  | quercetin          | CAT    |
|                            | lauric acid             | TBXA2R |                                 | quercetin          | PTGS2  |
|                            | hexadecanoic acid       | TBXA2R | <i>Angelica decursiva</i>       | adenine            | PTGS2  |
|                            | phenethylamine          | VIP    |                                 | coumarin           | NPY    |
|                            | ethanol                 | VIP    |                                 | camphor            | NPY    |
|                            | camphor                 | NPY    | <i>Panax ginseng</i>            | palmitic acid      | PTGS2  |
|                            | ethanol                 | NPY    |                                 | hexadecanoic acid  | PTGS2  |
|                            | apigenin                | CFTR   |                                 | adenine            | PTGS2  |
|                            | octanol                 | CFTR   |                                 | adenosine          | IL13   |
|                            | 1-octanol               | CFTR   |                                 | pentadecanoic acid | HRH1   |
|                            | ethanol                 | CFTR   |                                 | palmitic acid      | HRH1   |
|                            |                         |        |                                 | hexadecanoic acid  | HRH1   |
| <i>Pueraria lobata</i>     | genistein               | PTGS2  |                                 | protopine          | HRH1   |
|                            | genistein               | CFTR   |                                 |                    |        |
| <i>Poria cocos</i>         | adenine                 | PTGS2  |                                 | pentadecanoic acid | TBXA2R |
| <i>Pinellia ternata</i>    | glycine                 | CAT    |                                 | palmitic acid      | TBXA2R |
|                            | gamma-aminobutyric acid | NPY    |                                 | hexadecanoic acid  | TBXA2R |
| <i>Asiasarum sieboldii</i> | hexadecanoic acid       | PTGS2  |                                 | adenosine          | VIP    |
|                            | sesamol                 | PTGS2  |                                 | adenosine          | NPY    |
|                            | pentadecanoic acid      | HRH1   |                                 | adenosine          | CFTR   |
|                            | hexadecanoic acid       | HRH1   | <i>Saposhnikovia divaricata</i> | octanol            | CFTR   |
